# Supplementary material for: A Systematic Review of Mechanisms Underpinning Psychological Change Following Nature Exposure in an Adolescent Population
Source: MDPI journal article supplement (doi:10.3390/ijerph191912649), 2022-10-03
Supplement: s1 [file s1]

## Supplementary Material

### **File S1.** Electronic Search Strategies for Each Database: SCOPUS, Web of Science and PsychINFO **SCOPUS**

( TITLE-ABS-KEY ( "contact with nature" OR "nature exposure" OR "exposure to nature" OR "natur\* experience\*" OR "access to nature" OR "green space\*" OR greenspace OR greenery OR greenness OR forests OR "forest school" OR "shinrin yoku" OR "shinrin-yoku" OR "forest bathing" OR "forest environment" OR wilderness OR "blue space" OR park OR parks OR woodlands OR countryside OR "urban forest" OR "outdoor adventure interventions" OR "adventure therapy" OR gardening OR "natur\* environment\*" OR "outdoor adventure education" OR "adventure education" OR "adventure program" OR outdoors OR "green exercise" OR "nature therap\*" OR "green play" OR "nature therap\*" OR ecotherapy\* OR "school landscape" ) ) AND ( TITLE-ABS-KEY ( "mental health" OR anxiety OR depress\* OR mood OR well-being OR wellbeing OR well-being OR "strengths and difficulties" ) ) AND ( TITLE-ABS-KEY ( adolescen\* OR teen\* OR "young people" OR "young adult\*" OR youth\* ) )

#### *Web of Science*

#4: #3 AND #2 AND #1

#3: TS=( adolescen\* OR teen\* OR "young people" OR "young adult\*" OR youth\*)

#2: TS=("mental health" OR anxiety OR depress\* OR mood OR well-being OR wellbeing OR well-being OR "strengths and difficulties")

#1: TS

=( "contact with nature" OR "nature exposure" OR "exposure to nature" OR "natur\* experience\*" OR "access to nature" OR "green space\*" OR greenspace OR greenery OR greenness OR forests OR "forest school" OR "shinrin yoku" OR "shinrin-yoku" OR "forest bathing" OR "forest environment" OR wilderness OR "blue space" OR park OR parks OR woodlands OR countryside OR "urban forest" OR "outdoor adventure interventions" OR "adventure therapy" OR gardening OR "natur\* environment\*" OR "outdoor adventure education" OR "adventure education" OR "adventure program" OR outdoors OR "green exercise" OR "nature therap\*" OR "green play" OR "nature therap\*" OR ecotherapy\* OR "school landscape")

#### *PsychINFO*

1:( "contact with nature" OR "nature exposure" OR "exposure to nature" OR "natur\* experience\*" OR "access to nature" OR "green space\*" OR greenspace OR greenery OR greenness OR forests OR "forest school" OR "shinrin yoku" OR "shinrin-yoku" OR "forest bathing" OR "forest environment" OR wilderness OR "blue space" OR park OR parks OR woodlands OR countryside OR "urban forest" OR "outdoor adventure interventions" OR "adventure therapy" OR gardening OR "natur\* environment\*" OR "outdoor adventure education" OR "adventure education" OR "adventure program" OR outdoors OR "green exercise" OR "nature therap\*" OR "green play" OR "nature therap\*" OR ecotherapy\* OR "school landscape")

2: ("mental health" or anxiety or depress\* or mood or well-being or wellbeing or well-being or "strengths and difficulties").tw.

3. (adolescen\* or teen\* or "young people" or "young adult\*" or youth\*).tw.

4. 1 and 2 and 3

**Table S1.** Summary of the Measurement Tools Used in Each Study

| <b>Outcome</b>  | <b>Tool or measurement</b>                   | <b>Studies</b>                                                                                                                                                                     |
|-----------------|----------------------------------------------|------------------------------------------------------------------------------------------------------------------------------------------------------------------------------------|
| Mood and Affect | Profile of Mood States                       | Bielinis et al. (2019); Bielinis et al. (2021); Bielinis, Omelan et al. (2018); Bielinis, Takayama et al. (2018);<br>Mao et al. (2012); Park et al. (2011);<br>Park et al. (2010). |
|                 | Profile of Mood States – Short Form          | Lee et al. (2011); Lee et al. (2014); Song et al. (2014); Song et al. (2015); Song et al. (2013);<br>Takayama et al. (2011);<br>Tsunetsugu et al. (2013).                          |
|                 | Profile of Mood States – Adolescents         | Wood et al. (2013).                                                                                                                                                                |
|                 | Activation- Deactivation Adjective Checklist | Fuegen and Breitenbecher (2018).                                                                                                                                                   |
|                 | Positive and Negative Affect Schedule        | Bielinis et al. (2019); Bielinis et al. (2021); Bielinis, Omelan et al. (2018); Bielinis, Takayama et al. (2018); Takayama et al. (2011); Fuegen and Breitenbecher (2018).         |
|                 | Zuckerman's Inventory of Personal Reactions  | Greenwood and Gatersleben (2016); Hassan et al. (2018).                                                                                                                            |
|                 | Overall Happiness Scale                      | Hartig et al. (2003)                                                                                                                                                               |
| Mental Health   | Beck Depression Inventory                    | Shin and Oh (1996)                                                                                                                                                                 |
|                 | State Trait Anxiety Inventory                | Hassan et al. (2018); Lee et al. (2014); Song et al. (2014); Song et al. (2013); Song et al. (2015)                                                                                |
|                 | State Trait Anxiety Inventory- State version | Wang et al. (2016).                                                                                                                                                                |
| Wellbeing       | Basler Well-Being Questionnaire              | Kelz et al. (2015)                                                                                                                                                                 |
|                 | Recovery-Stress Questionnaire                | Kelz et al. (2015)                                                                                                                                                                 |

| Outcome               | Tool or measurement                                                                           | Studies                                                                                                                                                                                            |
|-----------------------|-----------------------------------------------------------------------------------------------|----------------------------------------------------------------------------------------------------------------------------------------------------------------------------------------------------|
| Perceived Restoration | Restorative Outcome Scale                                                                     | Bielinis et al. (2019);<br>Bielinis et al. (2021); Bielinis,<br>Omelan et al. (2018);<br>Bielinis, Takayama et al. (2018);<br>Takayama et al. (2011);                                              |
|                       | Perceived Restorativeness<br>Scale                                                            | Wang et al. (2016);<br>Kelz et al. (2015)                                                                                                                                                          |
| Stress                | Heart Rate (Beats per minute)                                                                 | Greenwood and Gatersleben<br>(2016); Lee et al. (2011); Lee et<br>al. (2014); Park et al. (2010);<br>Song et al. (2014); Song et al.<br>(2015); Song et al. (2013);<br>Tsunetsugu et al. (2013)    |
|                       | Electrocardiogram (R-R<br>intervals)                                                          | Wang et al. (2016)                                                                                                                                                                                 |
|                       | Heart Rate Variability (low-<br>frequency and high-frequency<br>band variance, R-R intervals) | Lee et al. (2011); Lee et al.<br>(2014); Park et al. (2010); Song<br>et al. (2014); Song et al. (2013).                                                                                            |
|                       | Blood Pressure (Systolic and<br>Diastolic)                                                    | Greenwood and Gatersleben<br>(2016); Hartig et al. (2003); Lee<br>et al. (2011); Tsunetsugu et al.<br>(2013); Hassan et al.(2018);<br>Park et al. (2010); Lee et al.<br>(2014); Kelz et al. (2015) |
|                       | Salivary Cortisol                                                                             | Lee et al. (2011); Park et al.<br>(2010)                                                                                                                                                           |
|                       | Serum Cortisol and<br>Testosterone                                                            | Mao et al. (2012)                                                                                                                                                                                  |
|                       | Electroencephalogram (High<br>Alpha, High Beta)                                               | Hassan et al. (2018)                                                                                                                                                                               |
|                       | Skin Conductance Response                                                                     | Wang et al. (2016)                                                                                                                                                                                 |

| <b>Outcome</b>        | <b>Tool or measurement</b>                                         | <b>Studies</b>                                                                                                                           |
|-----------------------|--------------------------------------------------------------------|------------------------------------------------------------------------------------------------------------------------------------------|
| Energy                | Subjective Vitality Scale                                          | Bielinis et al. (2019); Bielinis et al. (2021); Bielinis, Omelan et al. (2018); Bielinis, Takayama et al. (2018); Takayama et al. (2011) |
|                       | Activation-Deactivation Adjective Checklist (energy and tiredness) | Fuegen and Breitenbecher (2018)                                                                                                          |
|                       | Stress-refresh Feeling Test                                        | Tsunetsugu et al. (2013); Lee et al. (2011); Lee et al. (2014)                                                                           |
| Cognitive Functioning | Necker Cube Pattern Test                                           | Greenwood and Gatersleben (2016);Hartig et al. (2003)                                                                                    |
|                       | Digit Span Backwards                                               | Fuegen and Breitenbecher (2018); Wang et al. (2016)                                                                                      |
|                       | Attention Network Task                                             | Kelz et al. (2015)                                                                                                                       |
|                       | Search and Memory Task                                             | Hartig et al. (2003)                                                                                                                     |
|                       | The Symbol Digit Modalities Test                                   | Kelz et al. (2015)                                                                                                                       |
| Resilience            | Resilience Scale - Shortened Version                               | Scarf et al. (2017); Scarf et al. (2016); Hayhurst et al. (2015)                                                                         |
| Self-concept          | Rosenberg Self-esteem Scale                                        | McAnally et al. (2018); Wood et al. (2013).                                                                                              |
|                       | Single Item Self-esteem Scale                                      | Hunter et al. (2013)                                                                                                                     |
|                       | Self-Description Questionnaire III                                 | Hayhurst et al. (2015)                                                                                                                   |
|                       | General Self-efficacy Scale                                        | Hayhurst et al. (2015)                                                                                                                   |
| Pro-social Behaviour  | Strengths and Difficulties Questionnaire                           | McAnally et al. (2018)                                                                                                                   |
|                       | Empathic Concern Sub-scale                                         | McAnally et al. (2018)                                                                                                                   |

**Table S2.** Summary of Papers by Outcomes

| Outcome         |               | Weak |                                                                                                                                                                                     | Moderate                                          |                                                                                  | Strong |                                |
|-----------------|---------------|------|-------------------------------------------------------------------------------------------------------------------------------------------------------------------------------------|---------------------------------------------------|----------------------------------------------------------------------------------|--------|--------------------------------|
|                 |               | NS   | PS                                                                                                                                                                                  | NS                                                | PS                                                                               | NS     | PS                             |
| Mood and Affect | Negative Mood |      | Bielinis et al. (2021); Lee et al. (2011); Lee et al. (2014); Mao et al. (2012); Park et al. (2011); Park et al. (2010); Song et al. (2014); Song et al. (2015); Song et al. (2013) | Tsunetsugu et al. (2013); Wood et al. (2013)      | Bielinis et al. (2019); Bielinis, Takayama et al. (2018); Takayama et al. (2011) |        | Bielinis, Omelan et al. (2018) |
|                 | Positive Mood |      | Bielinis et al. (2021); Lee et al. (2011); Lee et al. (2014); Mao et al. (2012); Park et al. (2011); Park et al. (2010); Song et al. (2014); Song et al. (2015); Song et al. (2013) | Tsunetsugu et al. (2013); Bielinis et al. (2019). | Bielinis, Takayama et al. (2018); Takayama et al. (2011)                         |        | Bielinis, Omelan et al. (2018) |

| Outcome               |                       | Weak                   | Moderate                                                                        | Strong                                                  |                                                                                                                          |                                |
|-----------------------|-----------------------|------------------------|---------------------------------------------------------------------------------|---------------------------------------------------------|--------------------------------------------------------------------------------------------------------------------------|--------------------------------|
|                       |                       | NS                     | PS                                                                              | NS                                                      | PS                                                                                                                       | NS PS                          |
|                       | Negative Affect       | Bielinis et al. (2021) |                                                                                 | Bielinis et al. (2019); Fuegen and Breitenbecher (2018) | Takayama et al. (2011)                                                                                                   | Bielinis, Omelan et al. (2018) |
| Mental Health         | Anxiety               |                        | Hassan et al. (2018); Lee et al. (2014); Song et al. (2014); Song et al. (2015) |                                                         | Wang et al. (2016)                                                                                                       |                                |
|                       | Depression            |                        | Shin and Oh (1996)                                                              |                                                         |                                                                                                                          |                                |
|                       | Wellbeing             |                        | McAnally et al. (2018)                                                          |                                                         | Kelz et al. (2015)                                                                                                       |                                |
| Restoration           | Perceived Restoration |                        | Bielinis et al. (2021)                                                          |                                                         | Bielinis et al. (2019); Bielinis, Takayama et al. (2018); Takayama et al. (2011); Wang et al. (2016); Kelz et al. (2015) | Bielinis, Omelan et al. (2018) |
| Cognitive Functioning | Attention             |                        | Greenwood and Gatersleben (2016)                                                | Fuegen and Breitenbecher (2018)                         | Hartig et al. (2003); Wang et al. (2016)                                                                                 |                                |
|                       | Executive Functioning |                        |                                                                                 | Kelz et al. (2015)                                      |                                                                                                                          |                                |

| Outcome                |          | Weak                                                   | Moderate                                                                                                                           | Strong |                                                                                  |                                |
|------------------------|----------|--------------------------------------------------------|------------------------------------------------------------------------------------------------------------------------------------|--------|----------------------------------------------------------------------------------|--------------------------------|
|                        |          | NS                                                     | PS                                                                                                                                 | NS     | PS                                                                               | NS PS                          |
| Electrocardiogram      |          |                                                        |                                                                                                                                    |        | Wang et al. (2016)                                                               |                                |
| Heart Rate Variability |          |                                                        | Lee et al. (2011);<br>Lee et al. (2014);<br>Park et al. (2010);<br>Song et al. (2014);<br>Song et al. (2015)<br>Song et al. (2013) |        |                                                                                  |                                |
| Blood Pressure         |          | Greenwood and Gatersleben (2016);<br>Lee et al. (2011) | Hassan et al.(2018);<br>Park et al. (2010);<br>Lee et al. (2014)                                                                   |        | Tsunetsugu et al. (2013); Kelz et al. (2015); Hartig et al (2003)                |                                |
| Cortisol               |          |                                                        | Lee et al. (2011);<br>Mao et al. (2012);<br>Park et al. (2010)                                                                     |        |                                                                                  |                                |
| Electroencephalogram   |          |                                                        | Hassan et al.(2018)                                                                                                                |        |                                                                                  |                                |
| Skin Conductance       |          |                                                        |                                                                                                                                    |        | Wang et al. (2016)                                                               |                                |
| Energy                 | Vitality |                                                        | Bielinis et al. (2021)                                                                                                             |        | Bielinis et al. (2019); Bielinis, Takayama et al. (2018); Takayama et al. (2011) | Bielinis, Omelan et al. (2018) |

| Outcome              |                            | Weak | Moderate                                                                | Strong             |                                             |       |
|----------------------|----------------------------|------|-------------------------------------------------------------------------|--------------------|---------------------------------------------|-------|
|                      |                            | NS   | PS                                                                      | NS                 | PS                                          | NS PS |
| Energy               |                            |      |                                                                         |                    | Fuegen and Breitenbecher (2018)             |       |
| Refreshed            |                            |      | Lee et al. (2014);<br>Lee et al. (2011)                                 |                    | Tsunetsugu et al. (2013)                    |       |
| Resilience           |                            |      | Hayhurst et al. (2015)                                                  |                    | Scarf et al. (2017);<br>Scarf et al. (2016) |       |
| Self-concept         | Self-esteem                |      | McAnally et al. (2018); Hunter et al. (2013);<br>Hayhurst et al. (2015) | Wood et al. (2013) |                                             |       |
| Self-efficacy        |                            |      | Hayhurst et al. (2015)                                                  |                    |                                             |       |
| Pro-social behaviour | Pro-social behaviour       |      | McAnally et al. (2018)                                                  |                    |                                             |       |
|                      | Strengths and difficulties |      | McAnally et al. (2018)                                                  |                    |                                             |       |
|                      | Empathy                    |      | McAnally et al. (2018)                                                  |                    |                                             |       |





**Table S3.** Component Ratings for EPHPP Quality Appraisal Assessment

| Authors<br>(Year)                | EPHPP Criteria for Quantitative Studies |              |             |          |                        |                          |                |
|----------------------------------|-----------------------------------------|--------------|-------------|----------|------------------------|--------------------------|----------------|
|                                  | Selection Bias                          | Study Design | Confounders | Blinding | Data Collection Method | Withdrawals and Dropouts | Overall Rating |
| Bielinis et al. (2019)           | Moderate                                | Strong       | Weak        | Moderate | Strong                 | Strong                   | Moderate       |
| Greenwood and Gatersleben (2016) | Moderate                                | Strong       | Weak        | Weak     | Moderate               | Not Applicable           | Weak           |
| Hassan et al.(2018)              | Moderate                                | Strong       | Weak        | Weak     | Weak                   | Not Applicable           | Weak           |
| Bielinis et al. (2021)           | Moderate                                | Strong       | Weak        | Weak     | Strong                 | Not Applicable           | Weak           |
| Bielinis et al. (2018a)          | Moderate                                | Strong       | Strong      | Moderate | Strong                 | Weak                     | Moderate       |
| Bielinis et al. (2018b)          | Moderate                                | Strong       | Weak        | Moderate | Strong                 | Not Applicable           | Moderate       |
| Hartig et al. (2003)             | Moderate                                | Strong       | Strong      | Weak     | Moderate               | Not Applicable           | Moderate       |
| Lee et al. (2011)                | Moderate                                | Strong       | Moderate    | Weak     | Weak                   | Not Applicable           | Weak           |
| Lee et al. (2014)                | Strong                                  | Strong       | Moderate    | Weak     | Weak                   | Not Applicable           | Weak           |
| Mao et al. (2012)                | Moderate                                | Strong       | Moderate    | Weak     | Weak                   | Not Applicable           | Weak           |
| Park et al. (2011)               | Moderate                                | Strong       | Weak        | Weak     | Strong                 | Not Applicable           | Weak           |
| Park et al. (2010)               | Moderate                                | Strong       | Weak        | Weak     | Weak                   | Not Applicable           | Weak           |
| Song et al. (2014)               | Moderate                                | Weak         | Strong      | Weak     | Weak                   | Not Applicable           | Weak           |
| Song et al. (2015)               | Moderate                                | Weak         | Strong      | Weak     | Weak                   | Not Applicable           | Weak           |
| Song et al . (2013)              | Moderate                                | Weak         | Strong      | Weak     | Strong                 | Not Applicable           | Weak           |
| Takayama et al. (2011)           | Moderate                                | Strong       | Strong      | Weak     | Strong                 | Not Applicable           | Moderate       |
| Tsunetsugu et al. (2013)         | Moderate                                | Strong       | Moderate    | Weak     | Strong                 | Not Applicable           | Moderate       |
| McAnally et al. (2018)           | Moderate                                | Moderate     | Strong      | Weak     | Strong                 | Weak                     | Weak           |
| Fuegen and Breitenbecher (2018)  | Moderate                                | Strong       | Strong      | Weak     | Strong                 | Not Applicable           | Moderate       |
| Shin and Oh (1996)               | Moderate                                | Moderate     | Strong      | Weak     | Strong                 | Weak                     | Weak           |

| <b>Authors<br/>(Year)</b> | <b>EPHPP<br/>Criteria<br/>for<br/>Quantitative<br/>Studies<br/>Selection<br/>Bias</b> | <b>Study<br/>Design</b> | <b>Confounders</b> | <b>Blinding</b> | <b>Data<br/>Collection<br/>Method</b> | <b>Withdrawals and<br/>Dropouts</b> | <b>Overall<br/>Rating</b> |
|---------------------------|---------------------------------------------------------------------------------------|-------------------------|--------------------|-----------------|---------------------------------------|-------------------------------------|---------------------------|
| Wood et al. (2013)        | Strong                                                                                | Strong                  | Strong             | Weak            | Strong                                | Strong                              | Moderate                  |
| Kelz et al. (2015)        | Strong                                                                                | Moderate                | Strong             | Weak            | Strong                                | Moderate                            | Moderate                  |
| Scarf et al. (2017)       | Moderate                                                                              | Weak                    | Strong             | Strong          | Strong                                | Weak                                | Weak                      |
| Scarf et al. (2016)       | Moderate                                                                              | Moderate                | Moderate           | Moderate        | Strong                                | Weak                                | Moderate                  |
| Hayhurst et al. (2015)    | Moderate                                                                              | Moderate                | Strong             | Weak            | Strong                                | Weak                                | Weak                      |
| Hunter et al. (2013)      | Moderate                                                                              | Moderate                | Strong             | Weak            | Moderate                              | Weak                                | Weak                      |
